# Supplementary material for: Optimizing medication appropriateness in older adults: a randomized clinical interventional trial to decrease anticholinergic burden
Source: PubMed Central journal article supplement (PMC5442667; doi:10.1186/s13195-017-0263-9), 2017-05-23
Supplement: 13195_2017_263_MOESM1_ESM.pdf [file 13195_2017_263_MOESM1_ESM.pdf]

**Dear study participant, we would like to learn about your experience with our study and we will really appreciate your time responding. Thank you.**

1. From the list below, please rank the top three reasons why you decided to participate (1= most important 2= second most important 3= third most important).

\_\_\_ I was curious

\_\_\_ To help others

\_\_\_ To help myself

\_\_\_ I don't know

\_\_\_ Thought it might improve my access to health care

\_\_\_ Felt I had to

\_\_\_ For the compensation provided

\_\_\_ I didn't want to say no when asked to participate

\_\_\_ Other (Please explain \_\_\_\_\_)

The following questions deal with your reactions to participating in this study. Please circle the number that best describes your response.

|                                                                                                                           | Strongly disagree (No) | Disagree | Neutral (Maybe) | Agree | Strongly agree (Yes) |
|---------------------------------------------------------------------------------------------------------------------------|------------------------|----------|-----------------|-------|----------------------|
| 2. I was glad to be asked to participate in this study.                                                                   | 1                      | 2        | 3               | 4     | 5                    |
| 3. I understood the consent form.                                                                                         | 1                      | 2        | 3               | 4     | 5                    |
| 4. Before participating in this study, I used to talk to my doctor about the medications I am taking.                     | 1                      | 2        | 3               | 4     | 5                    |
| 5. Before participating in this study, I used to talk to my pharmacist about the medications I am taking.                 | 1                      | 2        | 3               | 4     | 5                    |
| 6. I understood the information provided by the study team.                                                               | 1                      | 2        | 3               | 4     | 5                    |
| 7. After enrolling in this study I talked to my doctor about the medications I am taking                                  | 1                      | 2        | 3               | 4     | 5                    |
| 8. After participating in this study I think it is important for me to understand more about the medications I am taking. | 1                      | 2        | 3               | 4     | 5                    |
| 9. I believe this study's results will be useful to others.                                                               | 1                      | 2        | 3               | 4     | 5                    |
| 10. After participating in this study I will talk to my doctor about my medications.                                      | 1                      | 2        | 3               | 4     | 5                    |
| 11. After participating in this study I will talk to my pharmacist about my medications.                                  | 1                      | 2        | 3               | 4     | 5                    |
| 12. Participation in this study added significant burden.                                                                 | 1                      | 2        | 3               | 4     | 5                    |
| 13. The study procedures took too long.                                                                                   | 1                      | 2        | 3               | 4     | 5                    |
| 14. Participating in this study was inconvenient for me.                                                                  | 1                      | 2        | 3               | 4     | 5                    |
| 15. I found participating in this study personally meaningful.                                                            | 1                      | 2        | 3               | 4     | 5                    |
| 16. I gained something positive from participating.                                                                       | 1                      | 2        | 3               | 4     | 5                    |

17. Do you have any recommendations for us to improve this study?

---



---
